# Supplementary material for: IFIT3 and IFIT5 Play Potential Roles in Innate Immune Response of Porcine Pulmonary Microvascular Endothelial Cells to Highly Pathogenic Porcine Reproductive and Respiratory Syndrome Virus
Source: MDPI journal article supplement (doi:10.3390/v14091919), 2022-08-30
Supplement: s1 [file s1]

**Table S2.** Specific siRNA Sequences of IFIT3 and IFIT5.

| siRNA name          | siRNA sequence (S: 5'-3') | siRNA sequence (AS: 5'-3') |
|---------------------|---------------------------|----------------------------|
| si-IFIT3            | GCAGUCCUCCGUGGAUUAUUTT    | AAUAUCCACGGAGGACUGCTT      |
|                     | GGAGCUUGACUGUGAAGAATT     | UUCUUCACAGUCAAGCUCCTT      |
|                     | GCAAAUCAGCUUCCACAAATT     | UUUGUGGAAGCUGAUUUGCTT      |
| si-IFIT5            | CCAAGAGACUUGCUCACAATT     | UUGUGAGCAAGUCUCUUGGTT      |
|                     | GGAAGAUACAAUUGGGCAATT     | UUGCCCAAUUGUAUCUUCCTT      |
|                     | GGUCUUCUCUGCGUACCAATT     | UGGUACGCAGAGAAGACCTT       |
| si-Negative Control | UUCUCCGAACGUGUCACGUTT     | ACGUGACACGUUCGGAGAATT      |
