# Supplementary material for: IFIT3 and IFIT5 Play Potential Roles in Innate Immune Response of Porcine Pulmonary Microvascular Endothelial Cells to Highly Pathogenic Porcine Reproductive and Respiratory Syndrome Virus
Source: MDPI journal article supplement (doi:10.3390/v14091919), 2022-08-30
Supplement: s1 [file s1]

**Table S1.** Primer Pairs Used for Quantitative RT-PCR in this Study.

| Target gene                     | Sequence (F: 5'-3')                           | Sequence (R: 5'-3')        |
|---------------------------------|-----------------------------------------------|----------------------------|
| <i>IFIT3</i>                    | CCGCCATCATGAGTGAGGT<br>C                      | TCATGCCAGACATGTTCTT<br>CCT |
| <i>IFIT5</i>                    | GAACCCAACCATCATGAGTAGAAATTCAAGCTGTTGCC<br>GAA | CA                         |
| <i>PRRSV N</i>                  | ATCGCCCAACAAAACCAG<br>TC                      | TGCGTCGGCAAACCTAACT<br>C   |
| <i>IFN-<math>\alpha</math></i>  | GCCTCCTGCACCAGTTCTA<br>CA                     | TGCATGACACAGGCTTCCA        |
| <i><math>\beta</math>-actin</i> | GACCACCTTCAACTCGATC<br>A                      | GTGTTGGCGTAGAGGTCCT<br>T   |
